# Supplementary material for: Fecal microbiota transplantation in puppies with canine parvovirus infection
Source: PubMed Central journal article supplement — J Vet Intern Med. 2018 Feb 20;32(2):707–11. doi: 10.1111/jvim.15072 (PMC5867004; doi:10.1111/jvim.15072), 2018-02-20
Supplement: JVIM-32-707-s001.pdf [file JVIM-32-707-s001.pdf]

Supplemental Table 1: Individual data from puppies with Parvovirus infection receiving only standard therapy with fluids and antibiotics (STD) or with standard therapy and fecal microbiota transplantation (STD=FMT).

| Group | Sample # | Weigh (kg) | Age (months) | Gender | Mixed breed? | Outcome | Days in hospital | # of FMT | PCV (%) | Leucocyte count | TP  | Antibiotic  |
|-------|----------|------------|--------------|--------|--------------|---------|------------------|----------|---------|-----------------|-----|-------------|
| STD   | 1        | 5          | 6            | M      | No           |         | 5                | N/A      | 51      | 3700            | 6   | CEF + Metro |
| STD   | 2        | 4.5        | 2            | F      | No           |         | 4                | N/A      | 49      | 1700            | 8   | TMS + Metro |
| STD   | 3        | 15         | 6            | M      | No           |         | 6                | N/A      | 51      | 1100            | 7.2 | TMS + Metro |
| STD   | 4        | 16.8       | 7            | F      | Yes          |         | 7                | N/A      | 40      | 1000            | 6.6 | TMS + Metro |
| STD   | 5        | 0.65       | 2            | F      | No           | Death   | N/A              | N/A      | 29      | 1200            | 3.8 | TMS + Metro |
| STD   | 6        | 2.1        | 2            | M      | No           | Death   | N/A              | N/A      | 29      | 6000            | 6.4 | CEF + Metro |
| STD   | 7        | 2.4        | 2            | M      | No           |         | 6                | N/A      | 25      | 7300            | 6   | TMS + Metro |
| STD   | 8        | 1.5        | 2            | M      | No           | Death   | N/A              | N/A      | 26      | 6400            | 5.8 | TMS + Metro |
| STD   | 9        | 1.7        | 2            | F      | No           | Death   | N/A              | N/A      | 26      | 6400            | 6.5 | TMS + Metro |
| STD   | 10       | 1.3        | 2            | M      | No           | Death   | N/A              | N/A      | 33      | 1500            | 6   | TMS + Metro |
| STD   | 11       | 2.1        | 2            | M      | Yes          |         | 3                | N/A      | 27      | 4200            | 5   | TMS + Metro |
| STD   | 12       | 10         | 4            | F      | Yes          |         | 6                | N/A      | 39      | 700             | 6.3 | TMS + Metro |
| STD   | 13       | 2.9        | 4            | F      | No           |         | 4                | N/A      | 46      | 600             | 7.2 | TMS + Metro |
| STD   | 14       | 5.9        | 4            | M      | No           | Death   | N/A              | N/A      | 30      | 900             | 7.2 | TMS + Metro |
| STD   | 15       | 16.5       | 4            | M      | No           | Death   | N/A              | N/A      | 46      | 1800            | 6.8 | TMS + Metro |
| STD   | 16       | 2.1        | 8            | F      | No           |         | 7                | N/A      | 63      | 10900           | 6   | TMS + Metro |
| STD   | 17       | 7          | 3            | M      | No           |         | 7                | N/A      | 33      | 800             | *   | TMS + Metro |
| STD   | 18       | 10         | 3            | M      | No           |         | 6                | N/A      | 32      | 5700            | *   | TMS + Metro |
| STD   | 19       | 10.8       | 3            | F      | No           |         | 6                | N/A      | 39      | 2500            | *   | TMS + Metro |
| STD   | 20       | 2.3        | 3            | F      | No           |         | 4                | N/A      | 39      | 1200            | *   | TMS + Metro |
| STD   | 21       | 9          | 4            | F      | Yes          |         | 9                | N/A      | 36      | 1800            | *   | TMS         |
| STD   | 22       | 4.8        | 9            | F      | Yes          | Death   | N/A              | N/A      | 46      | 100             | *   | CEF + Metro |
| STD   | 23       | 0.85       | 3            | F      | No           | Death   | N/A              | N/A      | 44      | 700             | *   | CEF         |
| STD   | 24       | 7          | 2            | F      | Yes          |         | 4                | N/A      | 39      | 600             | *   | TMS + Metro |

|         |    |      |    |   |     |       |     |     |    |      |     |             |
|---------|----|------|----|---|-----|-------|-----|-----|----|------|-----|-------------|
| STD     | 25 | 2.95 | 2  | M | Yes |       | 2   | N/A | 23 | 4600 | *   | TMS         |
| STD     | 26 | 2.75 | 4  | F | Yes |       | 6   | N/A | 59 | 5100 | *   | TMS         |
| STD     | 27 | 3.45 | 4  | M | Yes |       | 3   | N/A | 44 | 3500 | *   | TMS         |
| STD     | 28 | 5.1  | 6  | M | No  |       | 15  | N/A | 50 | 600  | *   | TMS + Metro |
| STD     | 29 | 1.8  | 5  | M | No  |       | 4   | N/A | 51 | 1200 | *   | TMS         |
| STD     | 30 | 2.3  | 3  | M | No  | Death | N/A | N/A | 44 | 1800 | *   | TMS + Metro |
| STD     | 31 | 1.2  | 2  | M | No  | Death | N/A | N/A | 38 | 2600 | *   | TMS + Metro |
| STD     | 32 | 3    | 4  | F | No  | Death | N/A | N/A | 52 | 350  | *   | TMS + Metro |
| STD     | 33 | 1.3  | 3  | F | No  |       | 3   | N/A | 34 | 2500 | *   | CEF         |
| STD-FMT | 34 | 4    | 7  | M | No  |       | 1   | 1   | 41 | 6400 | 6.4 | CEF + Metro |
| STD-FMT | 35 | 3.1  | 3  | M | No  | Death | N/A | 2   | 36 | 700  | 4.8 | TMS + Metro |
| STD-FMT | 36 | 8.3  | 10 | M | Yes |       | 2   | 2   | 60 | 1800 | 5.8 | TMS + Metro |
| STD-FMT | 37 | 12   | 3  | M | No  | Death | N/A | 1   | 39 | 600  | 6.8 | TMS + Metro |
| STD-FMT | 38 | 3.5  | 6  | M | No  |       | 2   | 2   | 55 | 1100 | 8   | CEF + Metro |
| STD-FMT | 39 | 4.4  | 12 | F | No  |       | 2   | 2   | 61 | 1600 | 8.3 | TMS + Metro |
| STD-FMT | 40 | 2.9  | 4  | M | No  | Death | N/A | 1   | 34 | 600  | 4.8 | TMS + Metro |
| STD-FMT | 41 | 1.6  | 5  | F | Yes |       | 3   | 2   | 52 | 1200 | 6.6 | TMS + Metro |
| STD-FMT | 42 | 10   | 3  | F | No  |       | 4   | 3   | 32 | 8000 | 5.8 | CEF         |
| STD-FMT | 43 | 1    | 4  | M | No  | Death | N/A | 2   | 47 | 1300 | 5   | TMS + Metro |
| STD-FMT | 44 | 3.9  | 4  | M | Yes |       | 2   | 2   | 41 | 1100 | 6.3 | TMS + Metro |
| STD-FMT | 45 | 5.5  | 3  | M | No  |       | 2   | 2   | 39 | 1300 | 5.5 | TMS + Metro |
| STD-FMT | 46 | 4.3  | 2  | F | No  |       | 2   | 2   | 45 | 1800 | 7.4 | TMS + Metro |
| STD-FMT | 47 | 5.6  | 4  | F | Yes |       | 3   | 2   | 55 | 1400 | 8   | TMS + Metro |
| STD-FMT | 48 | 4.5  | 3  | M | Yes |       | 3   | 2   | 23 | 8300 | 3.6 | TMS + Metro |
| STD-FMT | 49 | 6.5  | 11 | F | Yes |       | 4   | 2   | 55 | 4900 | 7.6 | TMS + Metro |
| STD-FMT | 50 | 10   | 5  | M | No  |       | 3   | 2   | 41 | 1000 | *   | TMS + Metro |
| STD-FMT | 51 | 0.6  | 3  | F | No  |       | 3   | 1   | 30 | 3300 | *   | CEF + Metro |
| STD-FMT | 52 | 2.5  | 6  | F | No  |       | 6   | 3   | 46 | 8800 | *   | CEF + Metro |
| STD-FMT | 53 | 12.5 | 10 | M | Yes |       | 5   | 2   | 47 | 5400 | *   | CEF         |

|         |    |      |   |   |     |       |     |   |    |       |   |             |
|---------|----|------|---|---|-----|-------|-----|---|----|-------|---|-------------|
| STD-FMT | 54 | 10.8 | 3 | M | No  |       | 4   | 2 | 39 | 11200 | * | TMS + Metro |
| STD-FMT | 55 | 7    | 4 | F | No  |       | 2   | 1 | 33 | 3400  | * | CEF         |
| STD-FMT | 56 | 5.7  | 8 | M | Yes |       | 6   | 3 | 42 | 6200  | * | TMS + Metro |
| STD-FMT | 57 | 5.2  | 5 | F | Yes | Death | N/A | 1 | 36 | 550   | * | TMS + Metro |
| STD-FMT | 58 | 4.4  | 5 | M | No  |       | 6   | 3 | 49 | 3200  | * | TMS + Metro |
| STD-FMT | 59 | 3.8  | 3 | M | Yes |       | 6   | 3 | 48 | 4400  | * | TMS + Metro |
| STD-FMT | 60 | 14.3 | 4 | M | No  | Death | N/A | 1 | 27 | 600   | * | TMS + Metro |
| STD-FMT | 61 | 1.7  | 4 | M | No  |       | 3   | 1 | 38 | 1400  | * | CEF + Metro |
| STD-FMT | 62 | 8    | 5 | F | Yes |       | 2   | 1 | 29 | 1600  | * | CEF         |
| STD-FMT | 63 | 8    | 5 | F | Yes |       | 2   | 1 | 35 | 600   | * | TMS + Metro |
| STD-FMT | 64 | 6    | 4 | M | Yes |       | 4   | 2 | 44 | 1700  | * | TMS + Metro |
| STD-FMT | 65 | 4.5  | 8 | F | Yes | Death | N/A | 1 | 50 | 1500  | * | TMS + Metro |
| STD-FMT | 66 | 3.4  | 5 | M | Yes |       | 4   | 2 | 52 | 800   | * | TMS + Metro |
|         |    |      |   |   |     |       |     |   |    |       |   |             |

\* Data not available

CEF: Cefalotin

TMS: trimethoprim sulfamethoxazole

Metro: metronidazole
